# Supplementary material
Source: publisher figshare collection journal article supplement (https://karger.figshare.com/ndownloader/files/37480765)
Supplement: Supplementary file 1 [file 37480765]

|  | **TBI+** | | **TBI<25** | | **TBI≥25** | | **Major TBI** | | **Minor TBI** | |
| --- | --- | --- | --- | --- | --- | --- | --- | --- | --- | --- |
|  | **B** | ***p*** | **B** | ***p*** | **B** | ***p*** | **B** | ***p*** | **B** | ***p*** |
| ***Cognition*** | | | | | | | | | | |
| Attention | -0.019 | *0.786* | -0.020 | *0.855* | -0.098 | *0.282* | -0.033 | *0.715* | 0.069 | *0.575* |
| Executive | -0.015 | *0.807* | -0.024 | *0.802* | 0.009 | *0.907* | -0.021 | *0.785* | -0.038 | *0.724* |
| Language | 0.056 | *0.389* | 0.078 | *0.440* | 0.036 | *0.667* | 0.062 | *0.451* | 0.104 | *0.363* |
| Memory | 0.001 | *0.991* | 0.010 | *0.930* | 0.008 | *0.928* | 0.063 | *0.488* | -0.049 | *0.696* |
| Visuospatial | 0.135 | *0.099* | 0.079 | *0.450* | 0.107 | *0.319* | 0.167 | *0.111* | 0.202 | *0.164* |
| ***Neuropsychiatric symptoms*** | | | | | | | | | | |
| Delusions | -0.004 | *0.978* | 0.125 | *0.548* | -0.096 | *0.561* | 0.173 | *0.313* | -0.129 | *0.568* |
| Hallucinations | -0.010 | *0.883* | -0.104 | *0.352* | -0.003 | *0.969* | 0.068 | *0.463* | -0.091 | *0.454* |
| Agitation | -0.024 | *0.884* | -0.301 | *0.261* | 0.116 | *0.588* | 0.169 | *0.446* | -0.228 | *0.435* |
| Depression | -0.222 | *0.281* | -0.198 | *0.552* | -0.159 | *0.550* | -0.020 | *0.942* | -0.272 | *0.453* |
| Anxiety | 0.268 | *0.199* | 0.427 | *0.205* | 0.239 | *0.376* | 0.440 | *0.230* | 0.442 | *0.112* |
| Dysphoria | -0.063 | *0.451* | -0.194 | *0.147* | 0.043 | *0.685* | 0.019 | *0.861* | -0.119 | *0.417* |
| Apathy | -0.288 | *0.302* | -0.455 | *0.313* | -0.259 | *0.472* | -0.123 | *0.742* | -0.199 | *0.685* |
| Disinhibition | 0.116 | *0.343* | 0.045 | *0.819* | 0.209 | *0.186* | 0.194 | *0.235* | -0.051 | *0.813* |
| Irritability | 0.051 | *0.818* | -0.328 | *0.362* | 0.228 | *0.429* | 0.678 | *0.022a* | -0.900 | *0.022a* |
| Aberrant motor | 0.226 | *0.188* | -0.003 | *0.992* | 0.437 | *0.048a* | 0.142 | *0.536* | 0.329 | *0.275* |
| Night-time behavior | 0.132 | *0.438* | -0.074 | *0.788* | 0.290 | *0.188* | -0.037 | *0.870* | 0.304 | *0.309* |
| Appetite | -0.082 | *0.693* | -0.319 | *0.341* | 0.154 | *0.564* | 0.141 | *0.609* | -0.445 | *0.222* |
| NPI total score | 0.101 | *0.922* | -1.380 | *0.408* | 1.199 | *0.369* | 1.846 | *0.180* | -1.360 | *0.454* |

**Supplementary Table.** Linear regression analysis between TBI and cognition/neuropsychiatric symptoms

*TBI<25 indicates age of TBI under 25 years old, TBI≥25 indicates age of TBI older than 25 years old. Major TBI indicates TBI with loss of consciousness and/or multiple TBI events. Minor TBI indicated single TBI without loss of consciousness. Values are displayed as Unstandardized Coefficients (B) and corresponding p-values. Cognition models are adjusted for the variables age, sex, APOE e4 genotype, disease stage and educational level, Neuropsychiatric symptom models are adjusted for the variables age, sex and disease stage. asignificance did not remain after adjustment for multiple testing. TBI: traumatic brain injury*
